# Supplementary material
Source: publisher site journal article supplement (https://www.dovepress.com/article/585217)
Supplement: Supplementary file 1 [file 585217%20Supplementary%20Materials.docx]

**sFig. 1 USP9X promotes HCC malignancy by stabilizing HSP90AA1, which acts as a key downstream effector.**


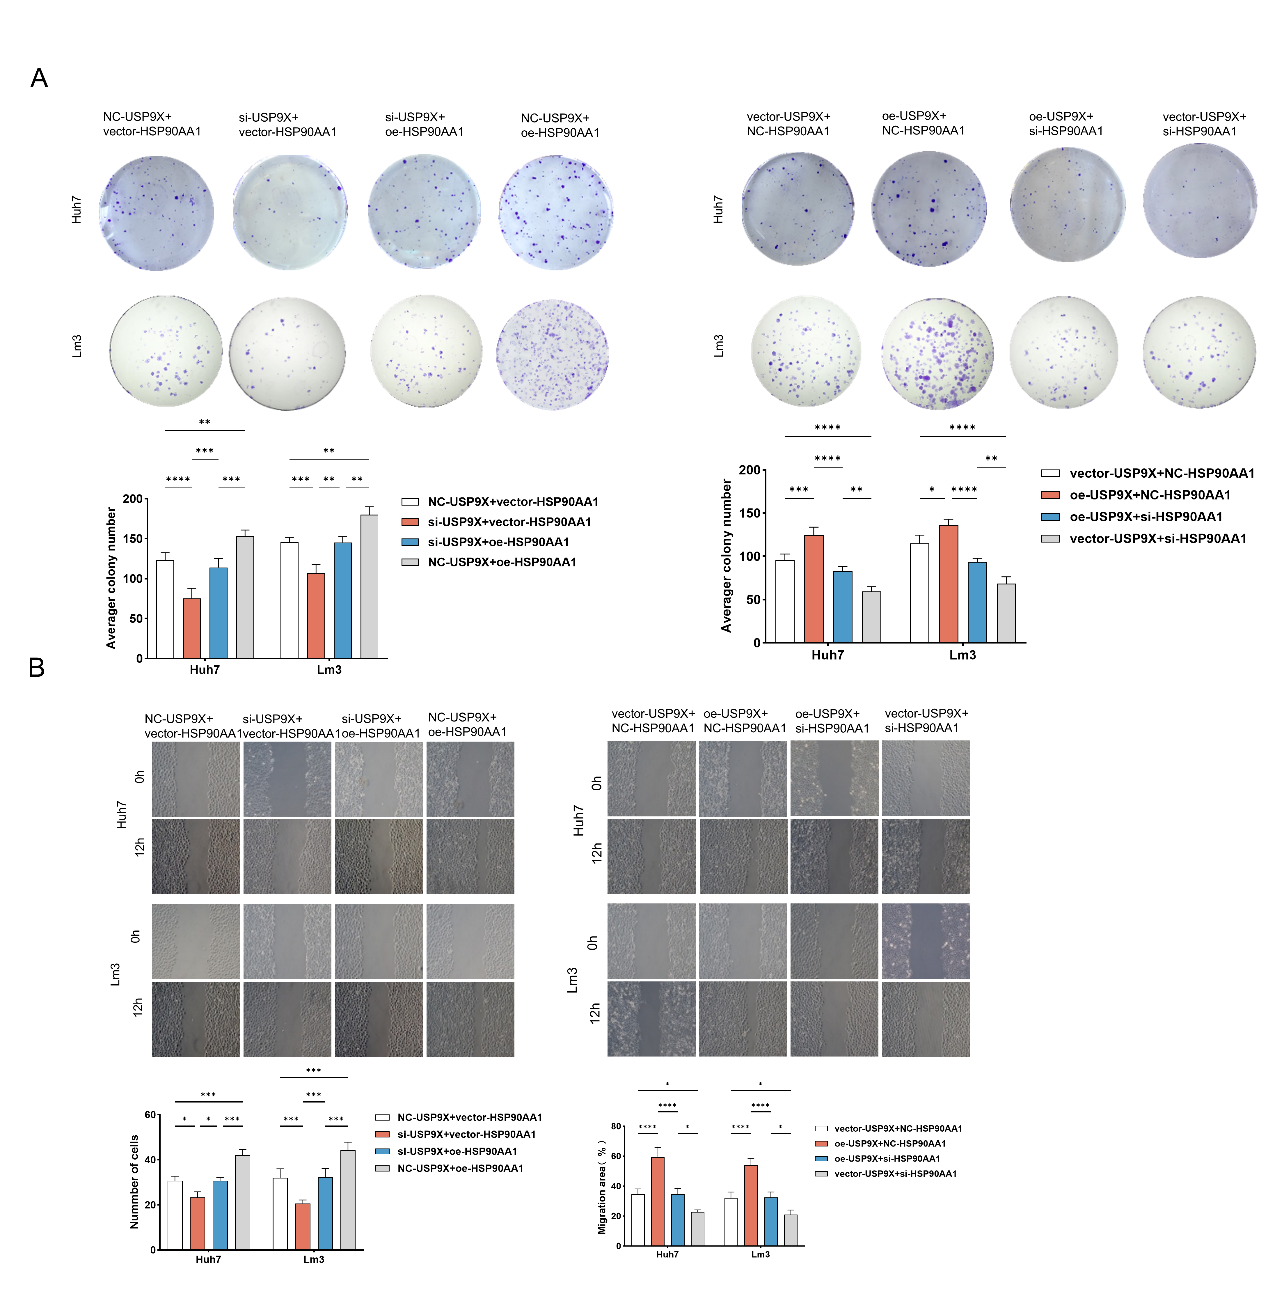


(A) Colony formation assays consistent with proliferation results: USP9X knockdown reduced colony numbers, rescued by HSP90AA1 overexpression; USP9X overexpression increased colonies, reversed by HSP90AA1 silencing. (B) Wound-healing assays showing representative images (0 h, 12 h) and quantification: USP9X knockdown slowed wound closure, rescued by HSP90AA1 overexpression; USP9X overexpression accelerated migration, attenuated by HSP90AA1 silencing (Huh7 and Lm3) (*P < 0.05, **P < 0.01, ***P < 0.001, **** P < 0.0001).

**Supplementary table 1. The primer sequences in this study**

| Primer name | Forward | Reverse |
| --- | --- | --- |
| USP9X | CAGCCGAAACCACCATCATT | TGTAGCCACCACGATGACCT |
| HSP90AA1 | AGGAGGTTGAGACGTTCGC | AGAGTTCGATCTTGTTTGTTCGG |
| GAPDH | GGTGGTCTCCTCTGACTTCAACA | GTTGCTGTAGCCAAATTCGTTGT |

**Supplementary table 2. The siRNA sequences in this study**

| siRNA name | Sense | Antisense |
| --- | --- | --- |
| si-NC | UUCUCCGAACGUGUCACGUTT | ACGUGACACGUUCGGAGAATT |
| siUSP9X-1# | CCCGCACUGAAACAAAUUATT | UAAUUUGUUUCAGUGCGGGTT |
| siUSP10-2# | GCUUAUUACAGCCAAACUUTT | AAGUUUGGCUGUAAUAAGCTT |
| siHSP90AA1 | GCUUGACAGAUCCCAGUAATT | UUACUGGGAUCUGUCAAGCTT |

**Supplementary Table 3. The detailed information of plasmids in this study**

| **Symbol** | **Transcript ID** | **Amino acids sequence** | **Vector** | **Source** |
| --- | --- | --- | --- | --- |
| **Flag-USP9X** | NM_001039591.3 | Full length | pCMV | TRANSHEEP BIO |
| **Myc-HSP90AA1** | NM_001017963.3 | Full length | pCMV | TRANSHEEP BIO |
